# Supplementary material
Source: bioRxiv or medRxiv preprint supplement (https://www.biorxiv.org/highwire/filestream/4088/field_highwire_adjunct_files/0/016121-1.pdf)
Supplement: Supplementary file [file 016121-1.pdf]

Coefficient of Variation

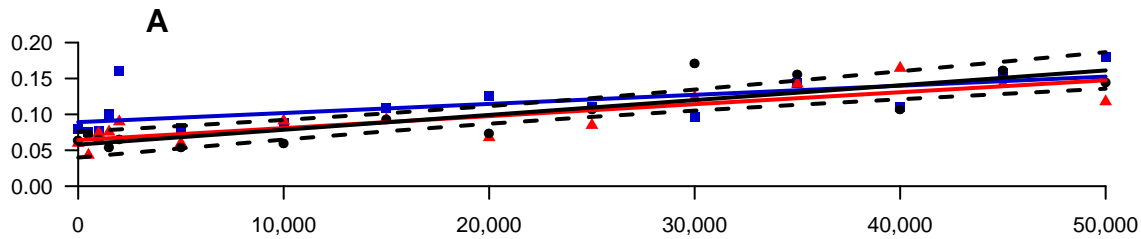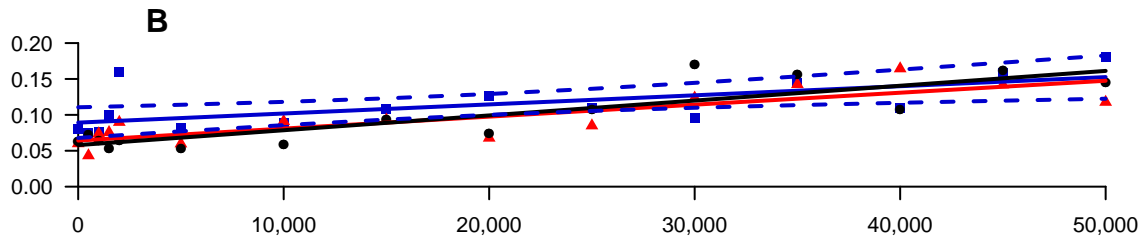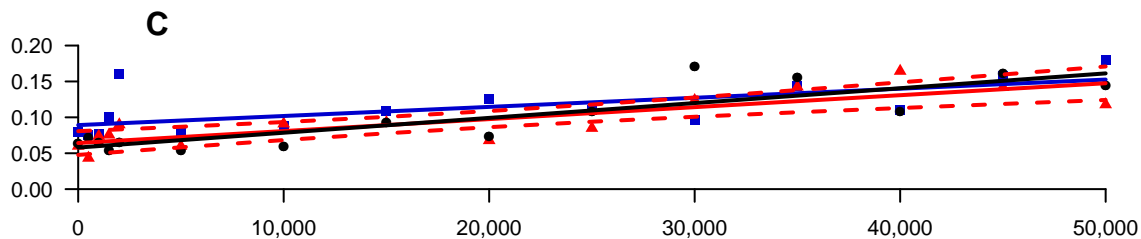

Time (generations)
